# Supplementary material for: Development of a Core Set of Self-Management Support Needs of Esophageal Cancer Patients: Results from a Delphi Study among Healthcare Professionals
Source: Hindawi journal article supplement (doi:10.1155/2023/3164450), 2023-03-14
Supplement: f1 [file 3164450.f1.docx]

Appendices

Table S1: Criteria per round and across rounds to determine whether a topic is stable. (stable category of consensus (mandatory), stable median and stable or decreased i.q.r., significant Spearman rank correlation and non-significant Wilcoxon signed-rank test)

|  | 7-9* round 1 | 7-9* round 2 | Median round 1 | Median round 2 | IQR round 1 | IQR round 2 | Stable category of consensus | non sign. Wilcoxon | significant spearman |
| --- | --- | --- | --- | --- | --- | --- | --- | --- | --- |
| **Esophageal cancer information** | | | | | | | | | |
| Physical consequences of disease | 91.2 | 97.9 | 8 | 8 | 1 | 0 | yes | 0.870 | 0.000 |
| Stage of disease | 83.8 | 89.6 | 8 | 8 | 2 | 1 | yes | 0.854 | 0.000 |
| Prognosis of disease | 89.7 | 91.7 | 8 | 8 | 2 | 1 | yes | 0.311 | 0.000 |
| Specific diagnosis information | 73.5 | 75.0 | 7 | 7 | 2 | 2 | yes | 0.591 | 0.001 |
| Symptoms of esophageal cancer | 83.8 | 87.5 | 8 | 8 | 1 | 0 | yes | 0.447 | 0.000 |
| **Treatment information** | | | | | | | | | |
| Complimentary treatments | 83.6 | 88.9 | 8 | 8 | 1 | 1 | yes | 0.045 | 0.000 |
| Treatment success | 87.9 | 95.6 | 8 | 8 | 1 | 0 | yes | 0.023 | 0.000 |
| Available treatments/treatment options | 92.4 | 97.8 | 8 | 8 | 1 | 1 | yes | 0.088 | 0.000 |
| Side effects of treatment | 89.4 | 93.3 | 8 | 8 | 2 | 0 | yes | 0.978 | 0.000 |
| Purpose of treatment | 84.8 | 95.6 | 8 | 8 | 2 | 1 | yes | 0.815 | 0.000 |
| Physical effects of treatment | 80.0 | 93.3 | 7 | 7 | 1 | 1 | yes | 0.240 | 0.000 |
| Tests and procedures involved in treatment | 82.5 | 82.2 | 7 | 7 | 1 | 1 | yes | 0.902 | 0.000 |
| Risk of treatment | 79.4 | 82.2 | 7 | 7 | 1 | 1 | yes | 0.126 | 0.000 |
| Treatment plan, treatment description, or logistical information | 92.1 | 100.0 | 8 | 8 | 2 | 1 | yes | 0.508 | 0.000 |
| Reducing side effects of treatment | 77.8 | 91.1 | 7 | 7 | 1 | 1 | yes | 0.146 | 0.000 |
| Advantages of treatment | 87.1 | 97.8 | 8 | 8 | 1 | 0 | yes | 0.028 | 0.000 |
| Progress during treatment | 75.8 | 82.2 | 7 | 7 | 1 | 1 | yes | 0.315 | 0.000 |
| **Prognosis information** | | | | | | | | | |
| Life span or survival rate | 90.3 | 95.6 | 8 | 8 | 2 | 1 | yes | 0.376 | 0.000 |
| Recurrence of cancer | 79.0 | 86.7 | 7 | 7 | 1 | 1 | yes | 0.101 | 0.000 |
| Outcome of no treatment or delayed treatment | 77.4 | 86.7 | 8 | 8 | 2 | 1 | yes | 0.129 | 0.000 |
| Effect on life plan or long term goals | 71.0 | 82.2 | 7 | 7 | 2 | 1 | yes | 0.572 | 0.000 |
| Chance of cure | 93.5 | 97.8 | 8 | 8 | 1 | 1 | yes | 0.936 | 0.000 |
| Metastasis | 71.0 | 84.4 | 7 | 7 | 2 | 1 | yes | 0.017 | 0.000 |
| Expectations for future health condition | 85.5 | 100.0 | 8 | 8 | 1 | 1 | yes | 0.033 | 0.000 |
| **Pre - and rehabilitation information** | | | | | | | | | |
| Recovery time | 85.5 | 97.8 | 8 | 8 | 2 | 0 | yes | 0.318 | 0.000 |
| Complications | 76.5 | 100.0 | 8 | 8 | 1 | 1 | yes | 0.011 | 0.000 |
| Side effects | 79.0 | 91.1 | 7 | 7 | 1 | 1 | yes | 0.236 | 0.000 |
| Follow-up care | 83.9 | 100.0 | 8 | 8 | 1 | 1 | yes | 0.005 | 0.000 |
| Nutrition during treatment | 80.6 | 100.0 | 8 | 8 | 1 | 0 | yes | 0.019 | 0.000 |
| Nutrition during recovery | 82.3 | 100.0 | 8 | 8 | 1 | 0 | yes | 0.002 | 0.000 |
| **Follow-up information** | | | | | | | | | |
| Maintaining physical health or physical activity | 82.3 | 95.6 | 7 | 7 | 1 | 1 | yes | 0.202 | 0.005 |
| Prevention | 72.6 | 80.0 | 7 | 7 | 2 | 1 | yes | 0.472 | 0.000 |
| What a patient can do | 77.4 | 88.9 | 7 | 7 | 1 | 1 | yes | 0.096 | 0.000 |

*Stable ratings across rounds estimated only for topics present in both rounds. stable category of consensus (‘consensus to be included’, ‘consensus to be excluded’ or ‘no consensus’).

Table S2: Kind of support; Criteria per round and across rounds to determine whether a topic is stable. (stable category of consensus (mandatory), stable median and stable or decreased i.q.r., significant Spearman rank correlation and non-significant Wilcoxon signed-rank test)

| **Kind of support** | 7-9* round 1 | 7-9* round 2 | Median round 1 | Median round 2 | IQR round 1 | IQR round 2 | Stable category of concensus | W | S |
| --- | --- | --- | --- | --- | --- | --- | --- | --- | --- |
| Face to face | 96,7 | 95.6 | 8 | 8 | 1 | 1 | yes | 0,808 | 0 |
| Written | 83,3 | 88.9 | 8 | 8 | 1 | 1 | yes | 0,694 | 0 |

*Stable ratings across rounds estimated only for topics present in both rounds. stable category of consensus (‘consensus to be included’, ‘consensus to be excluded’ or ‘no consensus’); W, Wilcoxon signed-rank test; S, Spearman rank correlation.
